# Supplementary material
Source: PubMed Central journal article supplement (PMC3438931)
Supplement: supp_M112.341040_jbc.M112.341040-1.pdf [file supp_M112.341040_jbc.M112.341040-1.pdf]

# Supplementary Figure 1

A

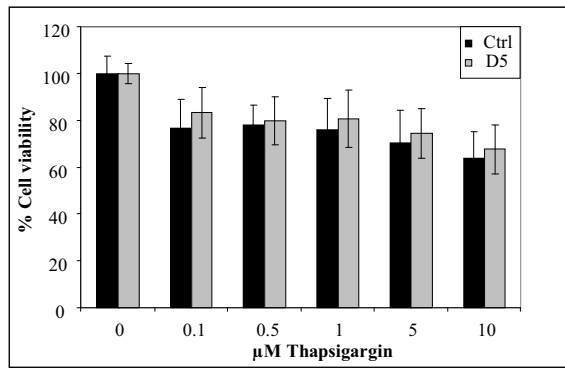

B

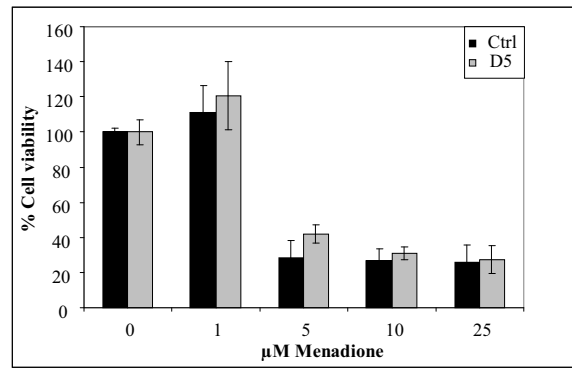

Supplementary Figure 2

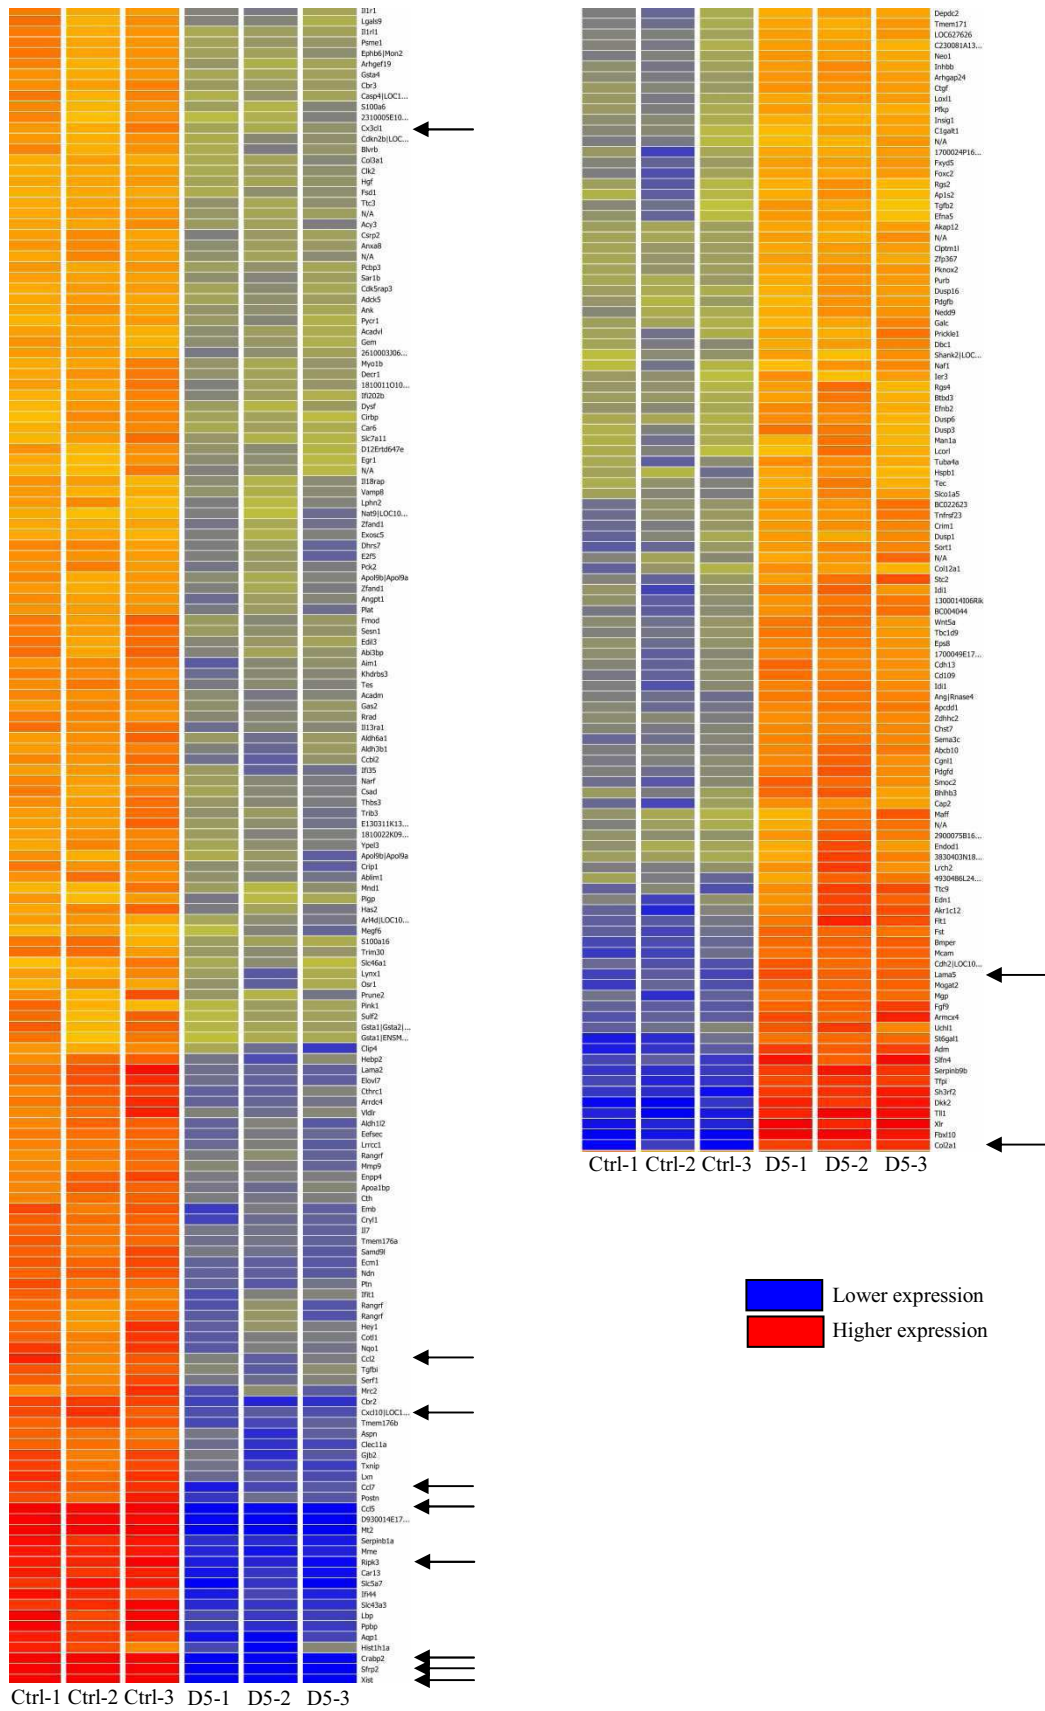

### Supplementary Figure 3

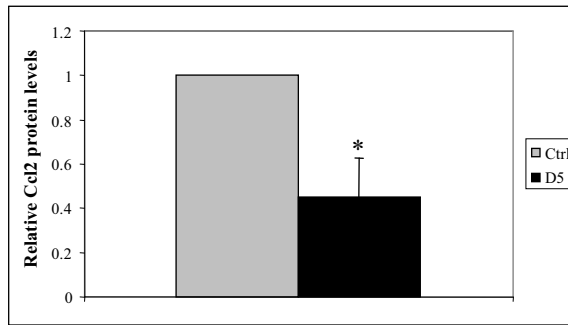

# Supplementary Figure 4

A

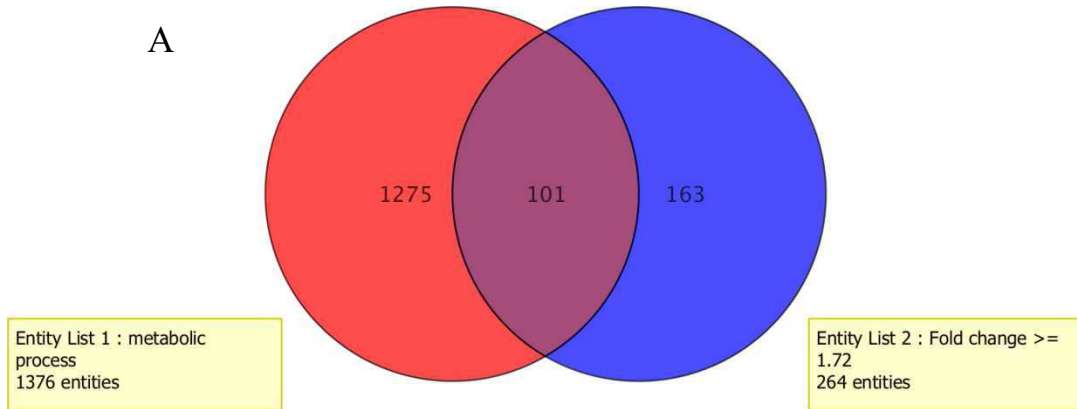

B

| Biological Pathway Analysis of metabolic genes                   | Count | %    |
|------------------------------------------------------------------|-------|------|
| Oxidation/reduction                                              | 16    | 16,2 |
| Phosphorus metabolic process                                     | 14    | 14,1 |
| Phosphate metabolic process                                      | 14    | 14,1 |
| Protein amino acid phosphorylation                               | 10    | 10,1 |
| Phosphorylation                                                  | 10    | 10,1 |
| Enzyme linked receptor protein signaling pathway                 | 9     | 9,1  |
| transmembrane receptor protein tyrosine kinase signaling pathway | 8     | 8,1  |

C

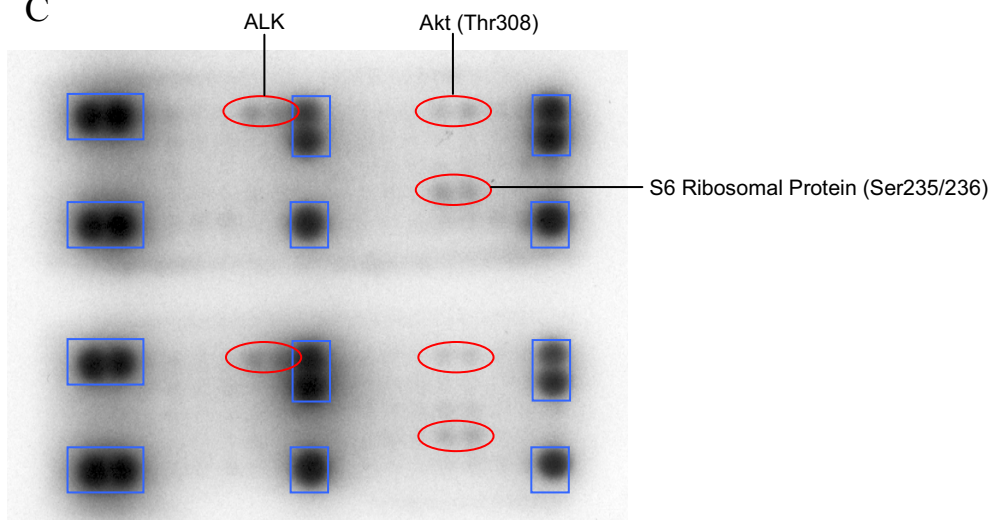

Supplementary Figure 5

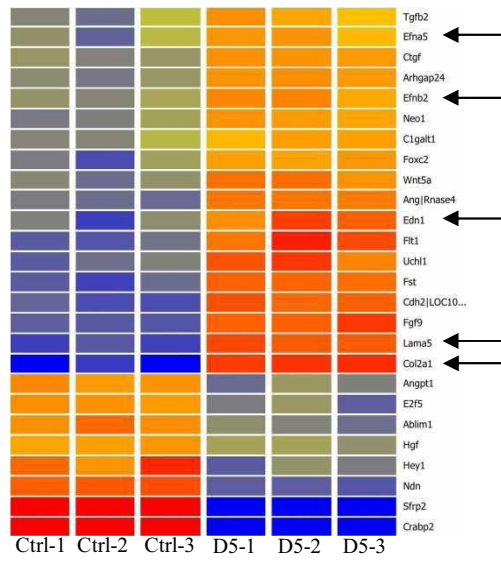

Supplementary Figure 6

A

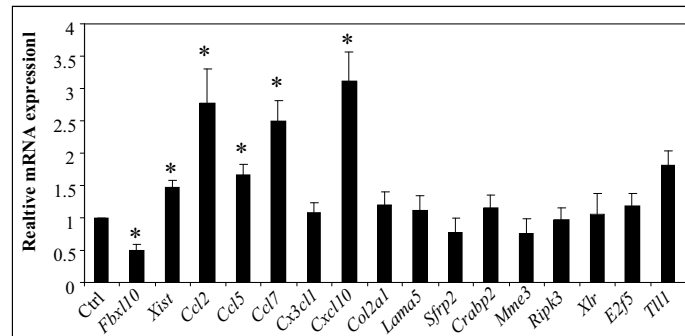

B

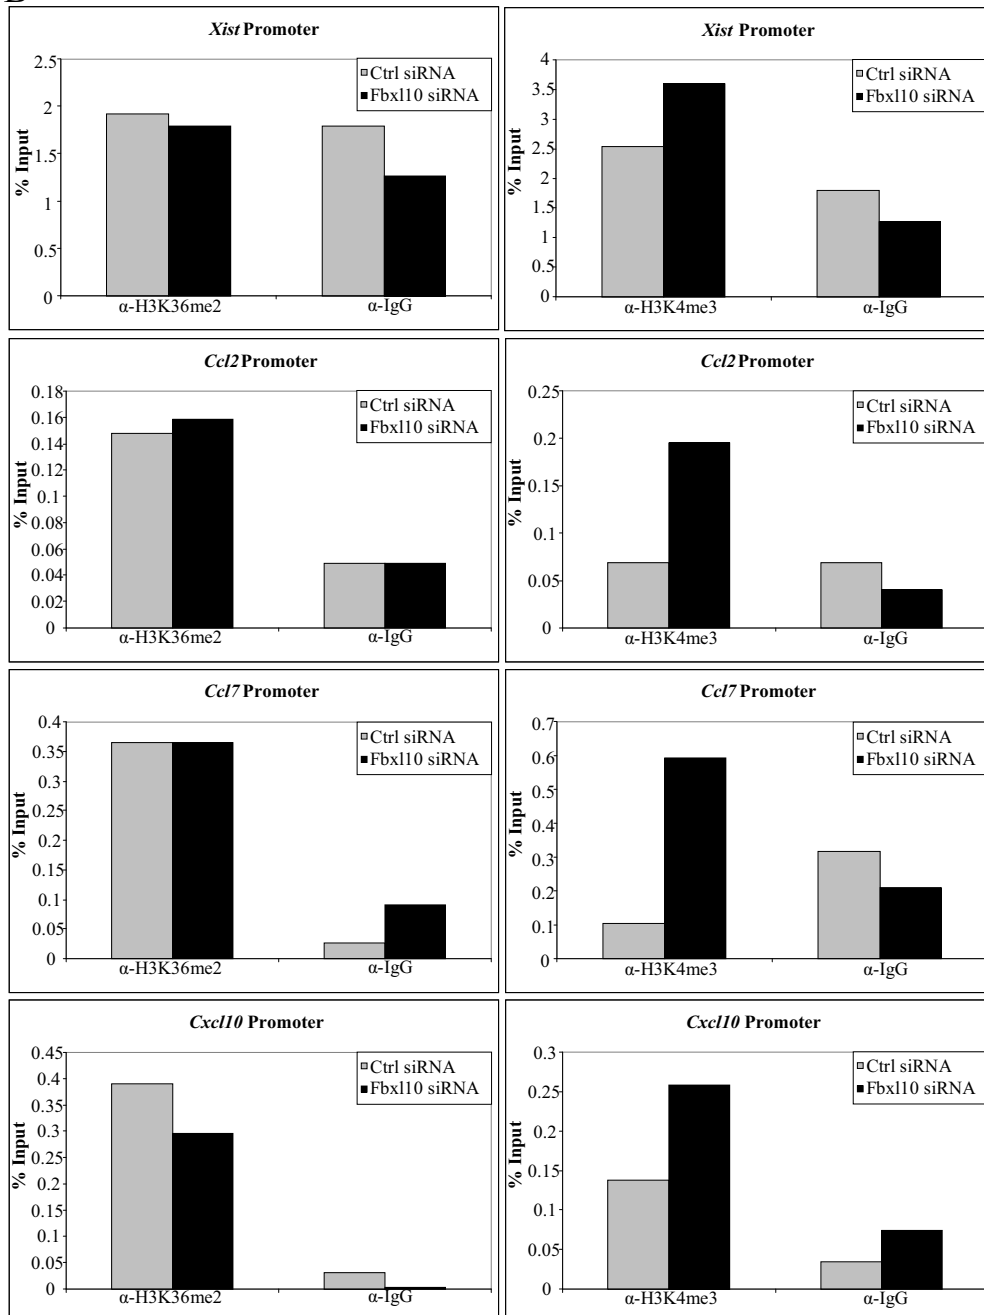

Supplementary Table 1: Fold change &gt; 2.0

| Transcripts Cluster Id | Fold change([c] vs [d]) | Regulation([c] vs [d]) | genesymbol    |
|------------------------|-------------------------|------------------------|---------------|
| 10349947               | 2,0185196               | up                     | Fmod          |
| 10368092               | 2,3247497               | up                     | Hebp2         |
| 10368409               | 2,7050016               | up                     | Lama2         |
| 10368947               | 2,1093938               | up                     | Aim1          |
| 10371332               | 2,3774958               | up                     | Aldh1l2       |
| 10379511               | 2,498809                | up                     | Ccl2          |
| 10379518               | 3,1114695               | up                     | Ccl7          |
| 10379636               | 3,2250414               | down                   | Slfn4         |
| 10381408               | 2,064001                | up                     | Ifi35         |
| 10381898               | 2,4381895               | up                     | Mrc2          |
| 10384961               | 2,1959867               | down                   | Stc2          |
| 10387219               | 2,182177                | up                     | Rangrf        |
| 10389207               | 4,985033                | up                     | Ccl5          |
| 10393936               | 3,2269564               | up                     | Cbr2          |
| 10396952               | 2,5336974               | down                   | Ttc9          |
| 10399005               | 2,0936263               | up                     | Crip1         |
| 10400941               | 2,0257242               | up                     | Dhrs7         |
| 10401473               | 2,0212188               | up                     | Aldh6a1       |
| 10403413               | 2,191143                | down                   | Idi1          |
| 10404069               | 2,9476492               | up                     | Hist1h1a      |
| 10404439               | 3,4050255               | down                   | Serpib9b      |
| 10404783               | 2,368587                | down                   | Edn1          |
| 10404913               | 2,0929923               | down                   | Cap2          |
| 10405047               | 2,5236857               | up                     | Aspn          |
| 10405587               | 2,2940283               | up                     | Tgfb1         |
| 10406877               | 2,3584483               | up                     | Serf1         |
| 10407072               | 2,670656                | up                     | Elovl7        |
| 10407327               | 2,6138093               | up                     | Emb           |
| 10407445               | 2,6469412               | down                   | Akr1c12       |
| 10408557               | 3,713821                | up                     | Serpib1a      |
| 10408629               | 2,1302078               | down                   | 1300014I06Rik |
| 10409857               | 2,106248                | down                   | 4930486L24Rik |
| 10412260               | 2,5084043               | down                   | Fst           |
| 10413482               | 2,0846803               | down                   | Wnt5a         |
| 10414245               | 2,0991228               | down                   | 1700049E17Rik |

|          |           |      |            |
|----------|-----------|------|------------|
| 10414537 | 2,2203555 | down | AnglRnase4 |
| 10415248 | 2,0136685 | up   | Pck2       |
| 10415651 | 2,6496415 | down | Fgf9       |
| 10420198 | 3,9608052 | up   | Ripk3      |
| 10420362 | 2,742642  | up   | Gjb2       |
| 10420372 | 2,5664954 | up   | Cryl1      |
| 10423836 | 2,4623888 | up   | Cthrc1     |
| 10424559 | 2,0834734 | up   | Khdrbs3    |
| 10428707 | 2,0488906 | up   | Has2       |
| 10432045 | 4,2519007 | down | Col2a1     |
| 10434758 | 2,7380004 | down | St6gal1    |
| 10434932 | 2,0115964 | down | BC022623   |
| 10436304 | 2,0250304 | up   | Abi3bp     |
| 10441902 | 2,3289142 | down | Smoc2      |
| 10446739 | 2,0601952 | up   | Clip4      |
| 10446986 | 2,0297766 | down | Crim1      |
| 10451054 | 2,3303342 | up   | Enpp4      |
| 10451838 | 3,9446802 | up   | Slc5a7     |
| 10455299 | 3,5632722 | down | Sh3rf2     |
| 10456184 | 2,1809506 | down | Apcdd1     |
| 10457644 | 2,5987916 | down | Cdh2       |
| 10462281 | 2,3756263 | up   | Vldlr      |
| 10462623 | 2,3125894 | up   | Ifit1      |
| 10464560 | 2,013742  | up   | Aldh3b1    |
| 10468691 | 2,0572517 | up   | Ablim1     |
| 10473384 | 3,6860065 | up   | Slc43a3    |
| 10478048 | 3,5698469 | up   | Lbp        |
| 10478633 | 2,1745474 | up   | Mmp9       |
| 10482762 | 2,1987135 | down | Idi1       |
| 10484389 | 3,2233043 | down | Tfpi       |
| 10490384 | 2,7803972 | down | Lama5      |
| 10490872 | 2,2890162 | up   | Lrrcc1     |
| 10490903 | 3,7098773 | up   | Car13      |
| 10492021 | 2,838398  | up   | Postn      |
| 10492355 | 3,8051453 | up   | Mme        |
| 10492798 | 16,845009 | up   | Sfrp2      |
| 10493108 | 6,6011953 | up   | Crabp2     |



|          |           |      |               |
|----------|-----------|------|---------------|
| 10493449 | 2,0227156 | up   | Thbs3         |
| 10494428 | 2,7711818 | up   | Txnip         |
| 10495285 | 2,1142733 | down | Sort1         |
| 10496125 | 3,8872027 | down | Dkk2          |
| 10496605 | 2,165922  | up   | Ccbl2         |
| 10497188 | 2,362999  | up   | Ii7           |
| 10497203 | 2,3294194 | up   | Hey1          |
| 10498576 | 2,80118   | up   | Lxn           |
| 10499309 | 2,3018272 | up   | Apoa1bp       |
| 10500204 | 2,6511865 | up   | Ecm1          |
| 10500683 | 2,2766564 | up   | Rangrf        |
| 10502791 | 3,5275402 | up   | Ifi44         |
| 10502951 | 2,0731506 | up   | Acadm         |
| 10503023 | 2,2586184 | up   | Cth           |
| 10519886 | 2,1858182 | down | Sema3c        |
| 10522208 | 2,4477682 | down | Uchl1         |
| 10523128 | 3,7312763 | up   | Ppbp          |
| 10526853 | 2,238378  | down | BC004044      |
| 10531415 | 2,870101  | up   | Cxcl10        |
| 10533569 | 4,6580815 | down | Fbxl10        |
| 10535807 | 2,6605794 | down | Fit1          |
| 10536483 | 2,099264  | up   | Tes           |
| 10538150 | 2,417709  | up   | Tmem176a      |
| 10538459 | 3,6123495 | up   | Aqp1          |
| 10542911 | 2,46169   | up   | Samd9l        |
| 10543959 | 2,4986053 | up   | Ptn           |
| 10544596 | 2,7572196 | up   | Tmem176b      |
| 10546104 | 2,352781  | up   | Eefsec        |
| 10548879 | 2,5480316 | down | Mgp           |
| 10548905 | 2,0354562 | down | Eps8          |
| 10549276 | 2,0782607 | down | Bhlhb3        |
| 10553833 | 2,6101627 | up   | Ndn           |
| 10556208 | 4,8129215 | up   | D930014E17Rik |
| 10556297 | 3,082966  | down | Adm           |
| 10558910 | 2,2893865 | up   | Rangrf        |
| 10562761 | 2,6461406 | up   | Clec11a       |
| 10564507 | 2,569824  | up   | Arrdc4        |

|          |           |      |               |
|----------|-----------|------|---------------|
| 10565786 | 2,657476  | down | Mogat2        |
| 10566358 | 2,0135567 | up   | Trim30        |
| 10571384 | 2,055027  | down | 2900075B16Rik |
| 10571399 | 2,0203824 | down | Zdhhc2        |
| 10573128 | 2,0808456 | down | Tbc1d9        |
| 10574023 | 5,025931  | up   | Mt2           |
| 10575844 | 2,1623735 | down | Cdh13         |
| 10578880 | 4,1425166 | down | Tll1          |
| 10581538 | 2,5736473 | up   | Nqo1          |
| 10582162 | 2,4596176 | up   | Cotl1         |
| 10582626 | 2,167196  | down | Abcb10        |
| 10583021 | 2,2207143 | down | Pdgfd         |
| 10583870 | 2,6399395 | down | Bmper         |
| 10584674 | 2,6280537 | down | Mcam          |
| 10587383 | 2,1731236 | down | Cd109         |
| 10594855 | 2,1248088 | down | Cgnl1         |
| 10598833 | 2,0729537 | down | Chst7         |
| 10599174 | 2,1796978 | up   | Il13ra1       |
| 10601768 | 2,8242118 | down | Armcx4        |
| 10604656 | 4,1068053 | down | Xlr           |
| 10606178 | 12,644036 | up   | Xist          |
| 10607225 | 2,159083  | down | Lrch2         |

Supplementary Table 2 Fold change >1.72

| Transcripts Cluster Id | Fold change([c] vs [d]) | Regulation([c] vs [d]) | genesymbol |
|------------------------|-------------------------|------------------------|------------|
| 10344837               | 1,8685813               | down                   | Depdc2     |
| 10345762               | 1,9308772               | up                     | Il1r1      |
| 10345791               | 1,7988302               | up                     | Il1r1      |
| 10345824               | 1,7833953               | up                     | Il18rap    |
| 10346015               | 1,7301016               | up                     | Col3a1     |
| 10354432               | 1,798501                | up                     | Myo1b      |
| 10355806               | 1,936994                | down                   | Tuba4a     |
| 10357155               | 1,901109                | down                   | Inhbb      |
| 10358389               | 1,789699                | down                   | Rgs2       |
| 10359908               | 1,8094392               | down                   | Rgs4       |
| 10360398               | 1,7889454               | up                     | Ifi202b    |

|          |           |      |               |
|----------|-----------|------|---------------|
| 10360920 | 1,7664295 | down | Tgfb2         |
| 10362201 | 1,8666977 | down | Ctgf          |
| 10362811 | 1,9750482 | up   | Sesn1         |
| 10364712 | 1,735593  | up   | Cirbp         |
| 10366043 | 1,7223457 | down | Dusp6         |
| 10366293 | 1,8527201 | up   | Csrp2         |
| 10367634 | 1,7291744 | down | Akap12        |
| 10369154 | 1,7934022 | down | Man1a         |
| 10370242 | 1,7887892 | up   | Pcbp3         |
| 10375893 | 1,8151299 | up   | Sar1b         |
| 10376887 | 1,8472012 | up   |               |
| 10379184 | 1,731849  | up   | Slc46a1       |
| 10381474 | 1,8478749 | up   | Arl4d         |
| 10383532 | 1,9471744 | up   | Narf          |
| 10384150 | 1,7226981 | down | Purb          |
| 10387768 | 1,7387538 | up   | Acadvl        |
| 10388902 | 1,9109592 | up   | Lgals9        |
| 10390283 | 1,7615943 | up   | Cdk5rap3      |
| 10391513 | 1,8727214 | down | Dusp3         |
| 10392856 | 1,730437  | up   | Nat9          |
| 10393887 | 1,7443689 | up   | Pycr1         |
| 10394534 | 1,8717893 | up   | Osr1          |
| 10397975 | 1,7820538 | up   | D12Erd647e    |
| 10401968 | 1,7248687 | down | Galc          |
| 10406067 | 1,7571944 | down | Clptm1l       |
| 10406504 | 1,9766463 | up   | Edil3         |
| 10407481 | 1,7644788 | down | Pfkip         |
| 10408850 | 1,7859792 | down | Nedd9         |
| 10410092 | 1,7410319 | down | Zfp367        |
| 10411459 | 1,8591299 | down | Tmem171       |
| 10414065 | 1,85319   | up   | Anxa8         |
| 10415282 | 1,8466594 | up   | Psme1         |
| 10423363 | 1,7910284 | up   | Ank           |
| 10424929 | 1,7629397 | up   | Adck5         |
| 10425049 | 1,8553932 | up   | Apol9b Apol9a |
| 10425283 | 1,8943094 | down | Maff          |
| 10428376 | 1,9471653 | up   | Angpt1        |

|          |           |      |               |
|----------|-----------|------|---------------|
| 10429515 | 1,8749421 | up   | Lynx1         |
| 10430174 | 1,9393712 | up   | Apol9b Apol9a |
| 10430660 | 1,7308462 | down | Pdgfb         |
| 10431738 | 1,8524629 | down | Prickle1      |
| 10432939 | 1,9750267 | up   | Csad          |
| 10436196 | 1,7636477 | up   |               |
| 10436978 | 1,8671557 | up   | Cbr3          |
| 10437080 | 1,7756072 | up   | Ttc3          |
| 10442904 | 1,8547914 | up   | 2610003J06Rik |
| 10444890 | 1,720375  | down | Ier3          |
| 10445237 | 1,865774  | down | LOC627626     |
| 10446001 | 1,7352318 | up   | Fsd1          |
| 10449284 | 1,9294127 | down | Dusp1         |
| 10452419 | 1,7981743 | down | Efna5         |
| 10454782 | 1,7332491 | up   | Egr1          |
| 10460263 | 1,8392911 | up   | Acy3          |
| 10461869 | 1,9403365 | up   | Prune2        |
| 10476538 | 1,786025  | down | Btbd3         |
| 10488029 | 1,8630521 | up   | Zfand1        |
| 10488608 | 1,977772  | up   | Trib3         |
| 10489759 | 1,8590957 | up   | Sulf2         |
| 10490894 | 1,9954771 | up   | E2f5          |
| 10493394 | 1,7337002 | up   | Clk2          |
| 10493798 | 1,8634024 | up   | S100a16       |
| 10493820 | 1,789774  | up   | S100a6        |
| 10497300 | 1,8565325 | up   | Zfand1        |
| 10497335 | 1,9494097 | up   | 1810022K09Rik |
| 10498024 | 1,7562462 | up   | Slc7a11       |
| 10498477 | 1,9987535 | up   | E130311K13Rik |
| 10499035 | 1,7371848 | up   | Mnd1          |
| 10502772 | 1,8183334 | up   | Lphn2         |
| 10502949 | 1,7743248 | up   |               |
| 10503334 | 1,7655979 | up   | Gem           |
| 10506470 | 1,9062203 | down | 1700024P16Rik |
| 10509947 | 1,7753454 | up   | Arhgef19      |
| 10510878 | 1,7560085 | up   | Megf6         |
| 10511679 | 1,8602443 | up   | Decr1         |

|          |           |      |               |
|----------|-----------|------|---------------|
| 10513805 | 1,8927995 | down | Dbc1          |
| 10514347 | 1,817671  | up   | Cdkn2b        |
| 10517600 | 1,7375684 | up   | Pink1         |
| 10518751 | 1,7345167 | up   | Car6          |
| 10519857 | 1,7420777 | up   | Hgf           |
| 10520362 | 1,7419034 | down | Insig1        |
| 10523579 | 1,9155074 | down | Arhgap24      |
| 10526410 | 1,7737281 | down | Hspb1         |
| 10529923 | 1,741175  | down | Lcorl         |
| 10530536 | 1,8224391 | down | Tec           |
| 10536369 | 1,735698  | down | C1galt1       |
| 10537157 | 1,7650263 | up   | 2310005E10Rik |
| 10537657 | 1,8746403 | up   | Ephb6 Mon2    |
| 10539517 | 1,7374016 | up   | Dysf          |
| 10545409 | 1,7428466 | up   | Vamp8         |
| 10545528 | 1,7308694 | up   | Pigp          |
| 10548735 | 1,7254977 | down | Dusp16        |
| 10549041 | 1,9184736 | down | Slco1a5       |
| 10551173 | 1,7696066 | up   | Exosc5        |
| 10551347 | 1,85922   | up   | Blvrb         |
| 10553521 | 1,9381909 | up   | Gas2          |
| 10557481 | 1,9133798 | up   | Ypel3         |
| 10559333 | 1,7332394 | down | Shank2        |
| 10562192 | 1,9448656 | down | Fxyd5         |
| 10569504 | 1,9893849 | down | Tnfrsf23      |
| 10570855 | 1,9794952 | up   | Plat          |
| 10572077 | 1,7499053 | down | Naf1          |
| 10574220 | 1,8016253 | up   | Cx3cl1        |
| 10576051 | 1,9489167 | down | Foxc2         |
| 10576911 | 1,862695  | down | Efnb2         |
| 10577641 | 1,8982402 | up   | 1810011O10Rik |
| 10581151 | 1,9849527 | up   | Rrad          |
| 10582896 | 1,7654147 | down |               |
| 10582916 | 1,949495  | down |               |
| 10582997 | 1,8235102 | up   | Casp4         |
| 10586174 | 1,7470022 | down |               |
| 10587315 | 1,7524824 | up   | Gsta4         |

|          |           |      |               |
|----------|-----------|------|---------------|
| 10587323 | 1,9024745 | up   | Gsta1 Gsta2   |
| 10587331 | 1,7434449 | up   | Gsta1         |
| 10590909 | 1,8717005 | down | Endod1        |
| 10592251 | 1,8195888 | down | Pknox2        |
| 10593856 | 1,820235  | down | C230081A13Rik |
| 10594066 | 1,8258604 | down | Loxl1         |
| 10594110 | 1,8625348 | down | Neo1          |
| 10595211 | 1,8347667 | down | Col12a1       |
| 10599680 | 1,9538494 | down | 3830403N18Rik |
| 10601583 | 1,9330322 | down |               |
| 10603051 | 1,7537897 | down | Ap1s2         |

Supplementary Table 3 Metabolic process genes

| Transcripts Cluster Id | Fold change([c] vs [d]) | Regulation([c] vs [d]) | genesymbol |
|------------------------|-------------------------|------------------------|------------|
| 10354432               | 1,798501                | up                     | Myo1b      |
| 10355806               | 1,936994                | down                   | Tuba4a     |
| 10360920               | 1,7664295               | down                   | Tgfb2      |
| 10362201               | 1,8666977               | down                   | Ctgf       |
| 10366043               | 1,7223457               | down                   | Dusp6      |
| 10369154               | 1,7934022               | down                   | Man1a      |
| 10371332               | 2,3774958               | up                     | Aldh1l2    |
| 10381474               | 1,8478749               | up                     | Arl4d      |
| 10384150               | 1,7226981               | down                   | Purb       |
| 10387768               | 1,7387538               | up                     | Acadvl     |
| 10391513               | 1,8727214               | down                   | Dusp3      |
| 10392856               | 1,730437                | up                     | Nat9       |
| 10393887               | 1,7443689               | up                     | Pycr1      |
| 10393936               | 3,2269564               | up                     | Cbr2       |
| 10396952               | 2,5336974               | down                   | Ttc9       |
| 10400941               | 2,0257242               | up                     | Dhrs7      |
| 10401473               | 2,0212188               | up                     | Aldh6a1    |
| 10401968               | 1,7248687               | down                   | Galc       |
| 10403413               | 2,191143                | down                   | Idi1       |
| 10404439               | 3,4050255               | down                   | Serpib9b   |

|          |           |      |               |
|----------|-----------|------|---------------|
| 10407072 | 2,670656  | up   | Elov17        |
| 10407445 | 2,6469412 | down | Akr1c12       |
| 10407481 | 1,7644788 | down | Pfkp          |
| 10409857 | 2,106248  | down | 4930486L24Rik |
| 10410092 | 1,7410319 | down | Zfp367        |
| 10414537 | 2,2203555 | down | AnglRnase4    |
| 10415248 | 2,0136685 | up   | Pck2          |
| 10420198 | 3,9608052 | up   | Ripk3         |
| 10420372 | 2,5664954 | up   | Cryl1         |
| 10424559 | 2,0834734 | up   | Khdrbs3       |
| 10424929 | 1,7629397 | up   | Adck5         |
| 10425283 | 1,8943094 | down | Maff          |
| 10428707 | 2,0488906 | up   | Has2          |
| 10432045 | 4,2519007 | down | Col2a1        |
| 10432939 | 1,9750267 | up   | Csad          |
| 10434758 | 2,7380004 | down | St6gal1       |
| 10436978 | 1,8671557 | up   | Cbr3          |
| 10449284 | 1,9294127 | down | Dusp1         |
| 10451054 | 2,3303342 | up   | Enpp4         |
| 10451838 | 3,9446802 | up   | Slc5a7        |
| 10454782 | 1,7332491 | up   | Egr1          |
| 10455299 | 3,5632722 | down | Sh3rf2        |
| 10460263 | 1,8392911 | up   | Acy3          |
| 10462281 | 2,3756263 | up   | Vldlr         |
| 10464560 | 2,013742  | up   | Aldh3b1       |
| 10478633 | 2,1745474 | up   | Mmp9          |
| 10482762 | 2,1987135 | down | Idi1          |
| 10488608 | 1,977772  | up   | Trib3         |
| 10489759 | 1,8590957 | up   | Sulf2         |
| 10490894 | 1,9954771 | up   | E2f5          |
| 10490903 | 3,7098773 | up   | Car13         |
| 10492355 | 3,8051453 | up   | Mme           |
| 10493108 | 6,6011953 | up   | Crabp2        |
| 10493394 | 1,7337002 | up   | Clk2          |
| 10494428 | 2,7711818 | up   | Txnip         |
| 10496605 | 2,165922  | up   | Ccbl2         |
| 10497203 | 2,3294194 | up   | Hey1          |

|          |           |      |             |
|----------|-----------|------|-------------|
| 10499035 | 1,7371848 | up   | Mnd1        |
| 10502951 | 2,0731506 | up   | Acadm       |
| 10503023 | 2,2586184 | up   | Cth         |
| 10511679 | 1,8602443 | up   | Decr1       |
| 10514347 | 1,817671  | up   | Cdkn2b      |
| 10517600 | 1,7375684 | up   | Pink1       |
| 10518751 | 1,7345167 | up   | Car6        |
| 10519857 | 1,7420777 | up   | Hgf         |
| 10520362 | 1,7419034 | down | Insig1      |
| 10522208 | 2,4477682 | down | Uchl1       |
| 10529923 | 1,741175  | down | Lcorl       |
| 10530536 | 1,8224391 | down | Tec         |
| 10533569 | 4,6580815 | down | Fbxl10      |
| 10535807 | 2,6605794 | down | Fit1        |
| 10536369 | 1,735698  | down | C1galt1     |
| 10537657 | 1,8746403 | up   | Ephb6 Mon2  |
| 10545528 | 1,7308694 | up   | Pigp        |
| 10546104 | 2,352781  | up   | Eefsec      |
| 10548735 | 1,7254977 | down | Dusp16      |
| 10548905 | 2,0354562 | down | Eps8        |
| 10549276 | 2,0782607 | down | Bhlhb3      |
| 10551173 | 1,7696066 | up   | Exosc5      |
| 10551347 | 1,85922   | up   | Blvrbl      |
| 10553833 | 2,6101627 | up   | Ndn         |
| 10565786 | 2,657476  | down | Mogat2      |
| 10566358 | 2,0135567 | up   | Trim30      |
| 10570855 | 1,9794952 | up   | Plat        |
| 10571399 | 2,0203824 | down | Zdhhc2      |
| 10572077 | 1,7499053 | down | Naf1        |
| 10576051 | 1,9489167 | down | Foxc2       |
| 10578880 | 4,1425166 | down | Tll1        |
| 10581538 | 2,5736473 | up   | Nqo1        |
| 10582626 | 2,167196  | down | Abcb10      |
| 10582997 | 1,8235102 | up   | Casp4       |
| 10587315 | 1,7524824 | up   | Gsta4       |
| 10587323 | 1,9024745 | up   | Gsta1 Gsta2 |
| 10587331 | 1,7434449 | up   | Gsta1       |



|          |           |      |               |
|----------|-----------|------|---------------|
| 10590909 | 1,8717005 | down | Endod1        |
| 10592251 | 1,8195888 | down | Pknox2        |
| 10593856 | 1,820235  | down | C230081A13Rik |
| 10594066 | 1,8258604 | down | Loxl1         |
| 10594110 | 1,8625348 | down | Neo1          |
| 10594855 | 2,1248088 | down | Cgnl1         |
| 10598833 | 2,0729537 | down | Chst7         |

**Supplementary Figure 1:**

Control and D5 cells were treated with increasing amounts of apoptose inducers thapsigargin (A) and menadione (B) followed by the measurement of cell viability by MTT assay. Cellular viability was decreased in both cases.

**Supplementary Figure 2:**

Whole transcriptome analysis of D5 and control cells identified 131 genes differentially expressed in D5 versus control cells (change fold >2).

**Supplementary Figure 3:**

Supernatants of control and D5 cells were collected and Ccl2 Elisa was performed. Ccl2 protein levels were significantly reduced in D5 cells compared to control cell line, confirming qRT-PCR results.

**Supplementary Figure 4:**

In total 1376 genes are listed to be involved in metabolic processes. Fbx110 over-expression changed transcription of 264 genes by a fold change > 1.72. 101 of these genes are found among the 1376 genes involved in metabolic processes (A). Biological pathway analysis of these 101 genes identified involvement of Fbx110 in oxidation/reduction and phosphor metabolism (B). Receptor tyrosin kinase signaling was analysed and showed no differences between D5 and control cells (C).

**Supplementary Figure 5:**

Functional classification of differentially expressed genes upon Fbx110 over-expression revealed regulation of 26 genes associated with `anatomical structure morphogenesis`.

**Supplementary Figure 6:**

SiRNA-approach against Fbx110 identified chemokines and *Xist* as targets of Fbx110 (A). ChIP analysis after knockdown of Fbx110 indicated that Fbx110 directly acts at the *Xist*, *Ccl2*, *Ccl7* and *Cxcl10* promoters by increasing H3K4me3 levels while H3K36me2 remained unchanged (B).

**Supplementary Table 1:**

Microarray analysis after Fbx110 over-expression revealed 131 genes differentially expressed by a fold change > 2.0. Fold change ratio is thereby presented as fold change Ctrl vs. D5.

**Supplementary Table 2:**

Reducing the cut off from fold change > 2.0 to a fold change >1.72 identified 133 additional target genes of Fbx110 by microarray analysis. Ctrl vs. D5 is shown as fold change ratio.

**Supplementary Table 3:**

Analysing microarray data set for genes involved in metabolic processes identified 101 Fbx110 target genes relevant for the metabolome.
